# Supplementary material for: Intrinsic structural distortion and exchange interactions in SmFexCr1−xO3 compounds
Source: Royal Society of Chemistry journal article supplement (doi:10.1039/c7ra13615c), 2018-01-01
Supplement: c7ra13615c1.pdf [file c7ra13615c1.pdf]

## *Supporting information*

### **Intrinsic structural distortion and exchange interaction in**

### **SmFe<sub>x</sub>Cr<sub>1-x</sub>O<sub>3</sub> compounds**

Zhongcheng Xiang,<sup>a</sup> Wenping Li,<sup>a</sup> Yimin Cui<sup>a,\*</sup>

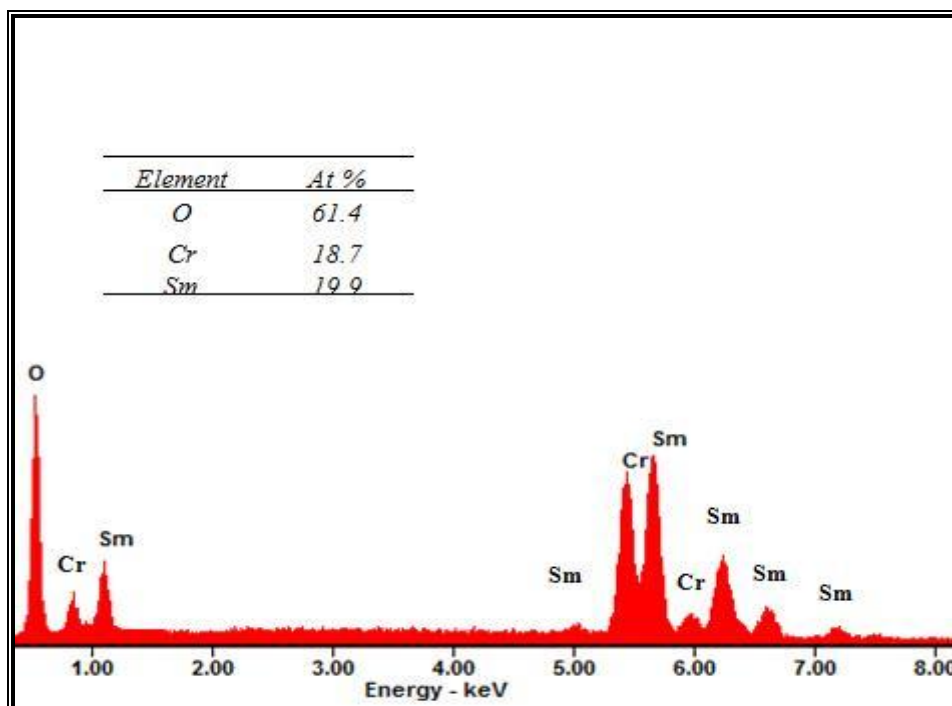

**Figure S1.** The original EDX spectrum of the  $\text{SmCrO}_3$  samples.

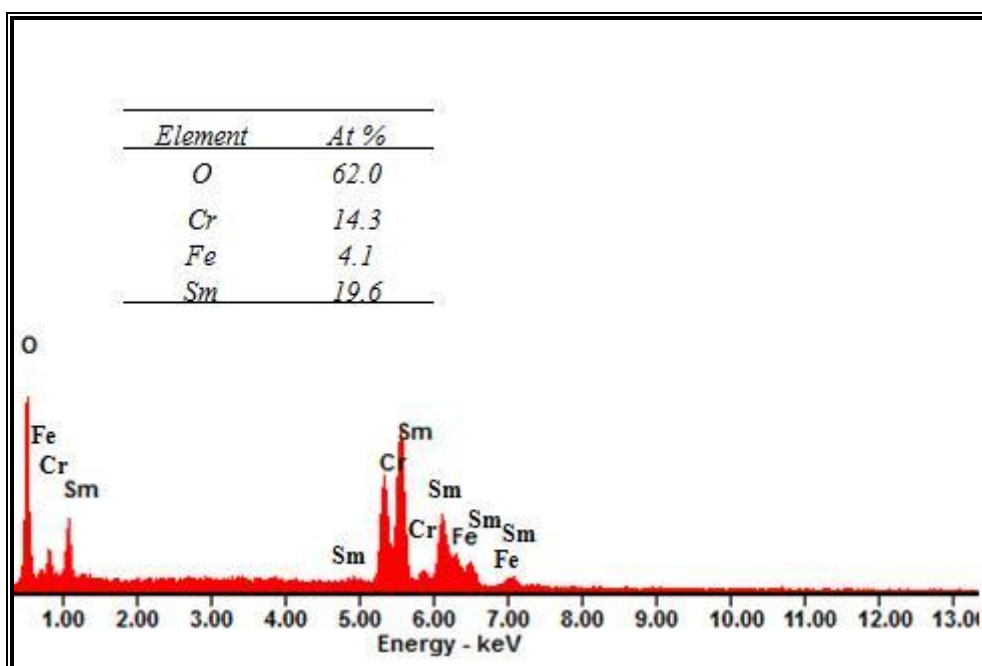

**Figure S2.** The original EDX spectrum of the  $\text{SmFe}_{0.2}\text{Cr}_{0.8}\text{O}_3$  samples.

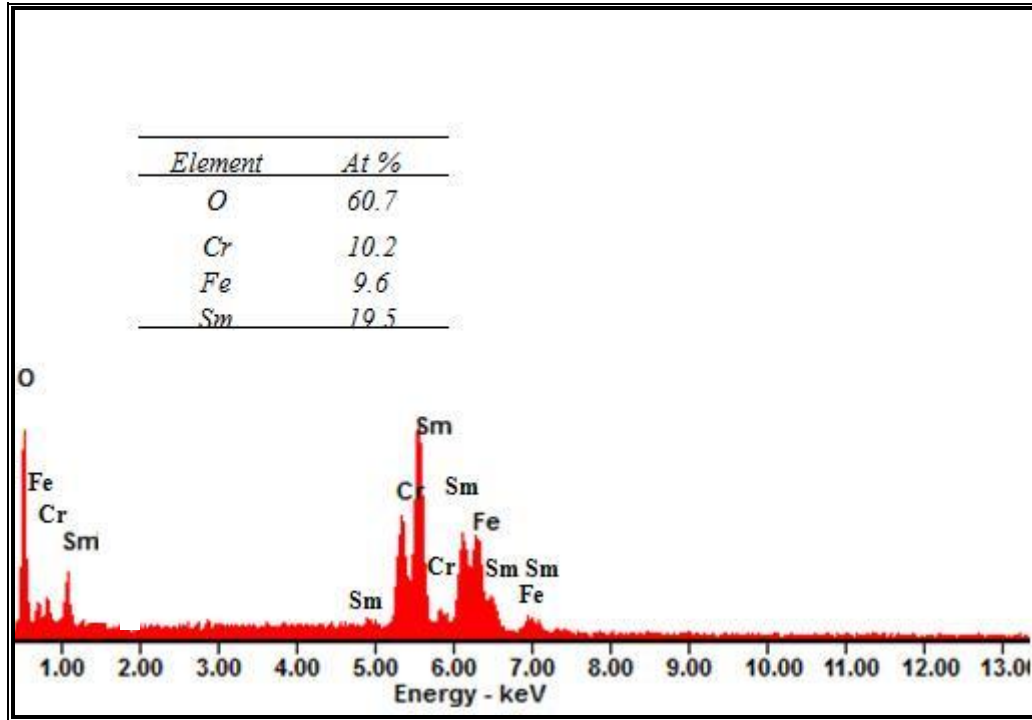

**Figure S3.** The original EDX spectrum of the  $\text{SmFe}_{0.5}\text{Cr}_{0.5}\text{O}_3$  samples.

**Table S1** Comparison of magnetic parameters for  $\text{SmCrO}_3$  samples with other works.

| sample           | Neel temperature (K) | $M_{eff} (\mu_B)$ | Weiss temperature (K) | Ref. |
|------------------|----------------------|-------------------|-----------------------|------|
| $\text{SmCrO}_3$ | 192                  | 7.711             | -613.4                | [3]  |
| $\text{SmCrO}_3$ | 193                  | 7.1               | -1080                 | [38] |
| $\text{SmCrO}_3$ | 197                  | -                 | -                     | [39] |

|                    |     |      |       |           |
|--------------------|-----|------|-------|-----------|
| SmCrO <sub>3</sub> | 192 | 5.46 | -670  | [20]      |
| SmCrO <sub>3</sub> | 193 | 7.95 | -1102 | This work |
